# Supplementary material
Source: PubMed Central journal article supplement (PMC5802316)
Supplement: 10-4338-aci-2017-06-r-0101-s170101ra.pdf [file 10-4338-aci-2017-06-r-0101-s170101ra.pdf]

## PRISMA Checklist

### Abstract

√ Structured Summary

### Introduction

√ Rationale

□ Objectives

- The objectives are not explicitly listed in a PICOS format as the study objective is not conducive that methodology due to the broader design

### Methods

□ Protocol and registration

- The novel protocol that was used in this study was developed as part of the study itself and therefore could not be registered in advance.

√ Eligibility criteria

√ Information sources

√ Search

√ Study selection

√ Data collection process

□ Data items

- This study did not collect specific data items
- Instead, it collected the general subject of the article discussion

□ Risk of bias in individual studies

- Given the nature of looking at the articles holistically, this study does not address this
- The key was to find the overall discussion topic in the literature rather than focus on individual articles

√ Summary measures

- Summary measures were consensus and inter-rater reliability (IRR) as discussed in the article

√ Synthesis of results

- Again, this was performed using consensus

□ Risk of bias across studies

- Given that the study used consensus of overall subject discussion across multiple articles in the literature, the risk of bias is not explicitly address

□ Additional analyses

- This was not done in the study as consensus and IRR was considered sufficient

### Results

√ Study selection

√ Study characteristics

□ Risk of bias within studies

- Not performed for the reasons discussed above

√ Results of individual studies

√ Synthesis of results

□ Risk of bias across studies

- This was not performed for reasons discussed above

□ Additional analysis

- This was not performed

**Discussion**

- √ Summary of evidence
- √ Limitations
- √ Conclusions

**Funding**

- √ Funding
